# Supplementary material for: Hepatocellular Brg1 promotes CCl4-induced liver inflammation, ECM accumulation and fibrosis in mice
Source: PubMed Central journal article supplement (PMC10688683; doi:10.1371/journal.pone.0294257), 2023-11-30

**Figure 1A**

Full length gels of all Western blots shown in the figures.

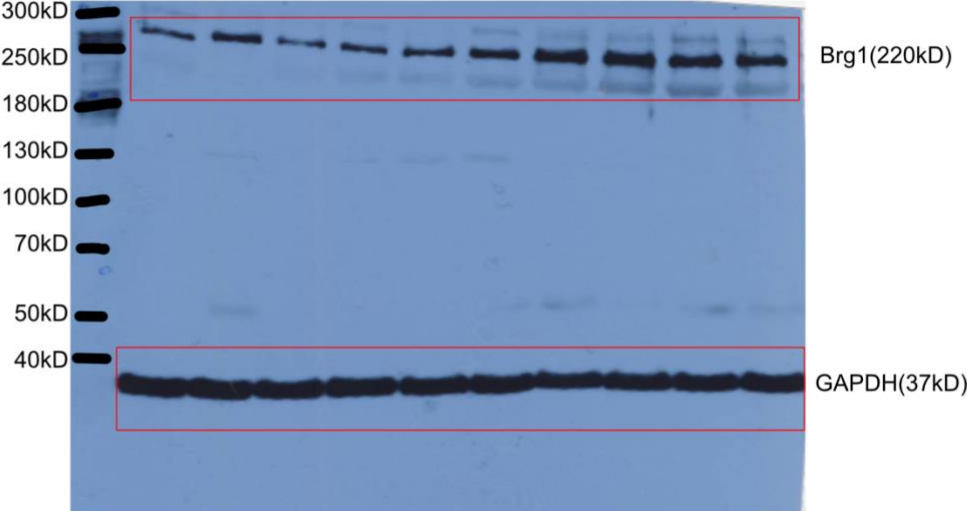

**Figure 4A**

Full length gels of all Western blots shown in the figures.

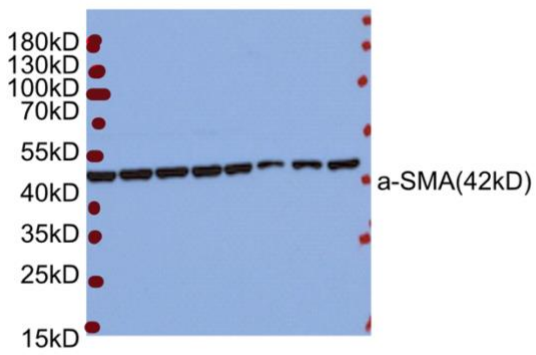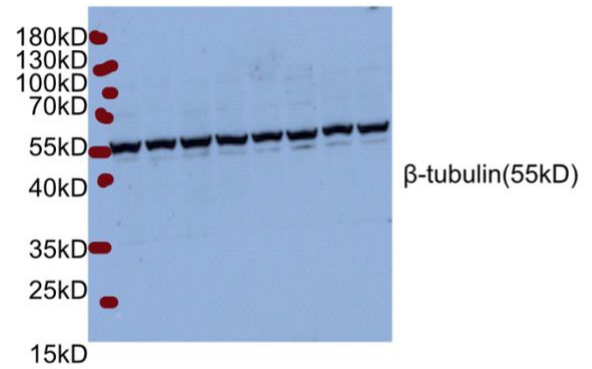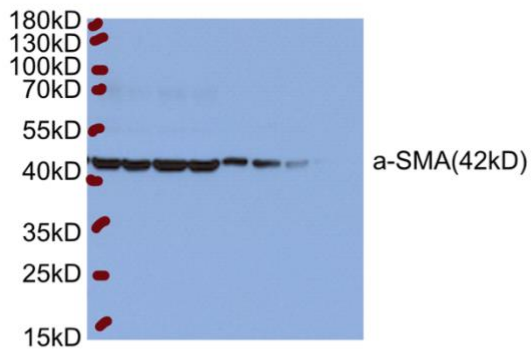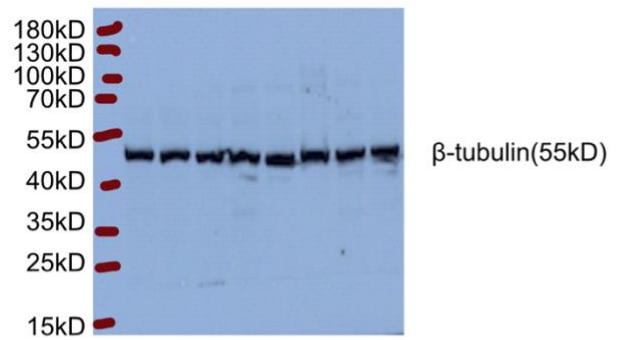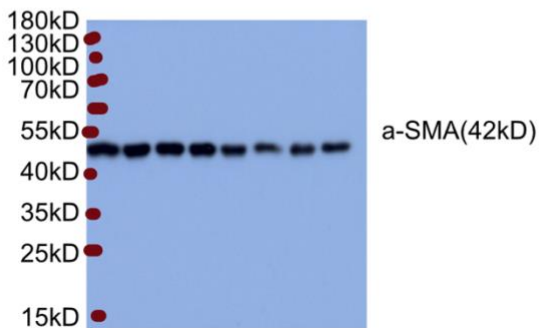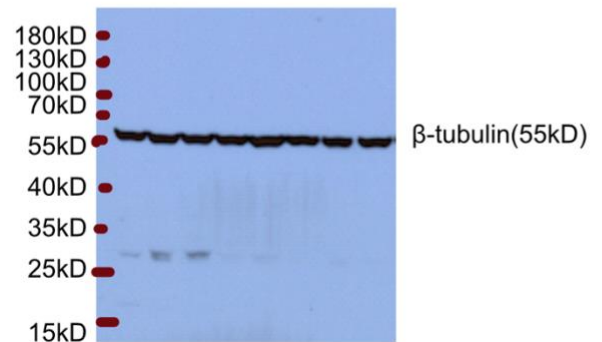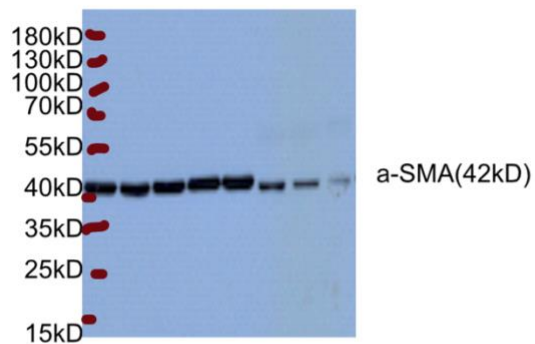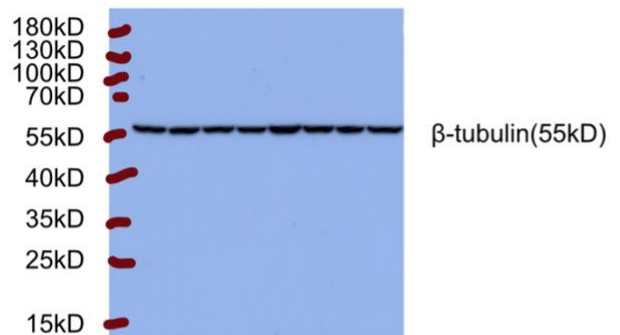

**Figure 5A**

Full length gels of all Western blots shown in the figures.

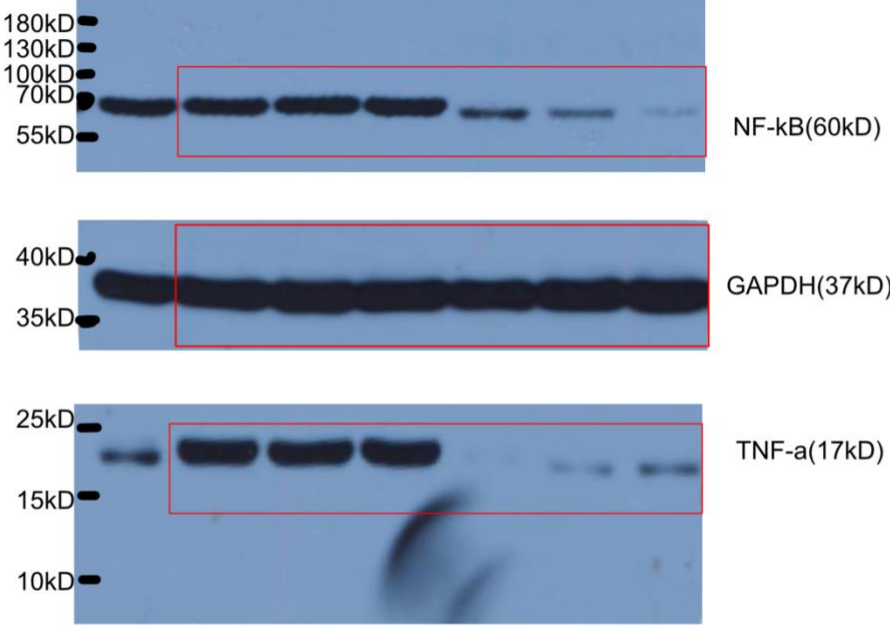

Supplement: pone.0294257.s001.pdf [file pone.0294257.s001.pdf]
